# Supplementary material for: Connecting the conformational behavior of cyclic octadepsipeptides with their ionophoric property and membrane permeability
Source: PubMed Central journal article supplement (PMC7796559; doi:10.1039/d0ob01447h), 2020-09-23
Supplement: NIHMS1659706-supplement-Main_SI.pdf [file NIHMS1659706-supplement-Main_SI.pdf]

# Supporting Information

## Connecting the Conformational Behavior of Cyclic Octadepsipeptides With Their Ionophoric Property and Membrane Permeability

Thomas Stadelmann<sup>[a]</sup>, Govindan Subramanian<sup>[b]</sup>, Sanjay Menon<sup>[b]</sup>, Chad E.  
Townsend<sup>[c]</sup>, R. Scott Lokey<sup>[c]</sup>, Marc-Olivier Ebert\*<sup>[a]</sup>, Sereina Riniker\*<sup>[a]</sup>

---

[a] Department of Chemistry and Applied Biosciences, ETH Zurich, Vladimir-Prelog-  
Weg 1-5, 8093 Zurich, Switzerland

[b] Veterinary Medicine Research & Development, Zoetis, 333 Portage Street, Bldg.  
300, Kalamazoo, Michigan 49007, USA

[c] Department of Chemistry and Biochemistry, University of California, Santa Cruz,  
California 93064, USA

\* marc-olivier.ebert@org.chem.ethz.ch; sriniker@ethz.ch

## NMR Assignments:

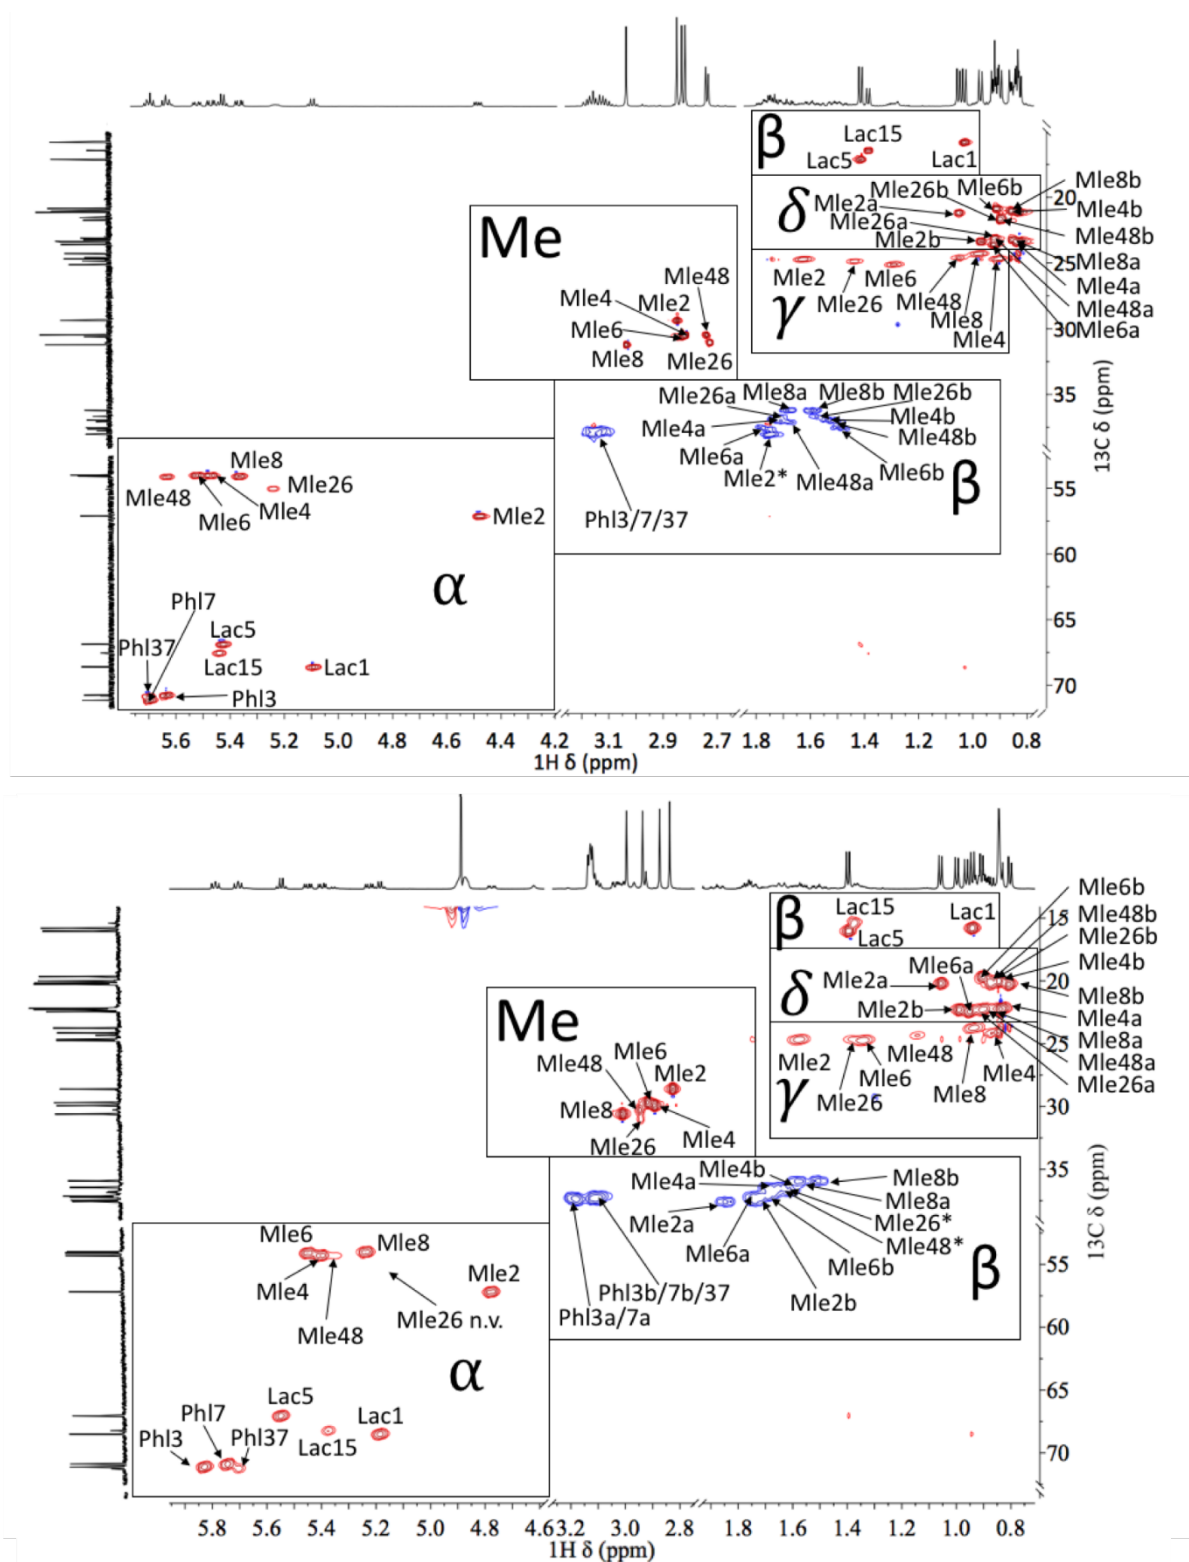

**Figure S 1.**  $^{13}\text{C}$ -HSQC spectra of PF1022A (1) in  $\text{CDCl}_3$  (top) and in  $\text{CD}_3\text{OH}$  (bottom). Empty regions are cut out for clarity. S 7v: not visible with the employed contour levels.

**Table S 1.** Assignment of the major (asymmetric) and minor (symmetric) conformation of PF1022A (**1**) in CDCl<sub>3</sub> referenced to the residual CHCl<sub>3</sub> shift in the solvent set to 7.29 ppm. \* indicates non-assignable signals due to overlap.

|                   | H $\alpha$ | H $\beta$  | H $\gamma$ | H $\delta$ | H $\epsilon$ | H $\zeta$    | HMe       |      |
|-------------------|------------|------------|------------|------------|--------------|--------------|-----------|------|
| Lac <sup>1</sup>  | 5.10       | 1.03       | -          | -          | -            | -            | -         |      |
| Mle <sup>2</sup>  | 4.49       | 1.75       | 1.63       | 1.05, 0.97 | -            | -            | 2.85      |      |
| Phi <sup>3</sup>  | 5.70       | 3.15       | -          | 7.25       | 7.31         | 7.28         | -         |      |
| Mle <sup>4</sup>  | 5.47       | 1.73, 1.53 | 0.91       | 0.86, 0.84 | -            | -            | 2.82      |      |
| Lac <sup>5</sup>  | 5.43       | 1.41       | -          | -          | -            | -            | -         |      |
| Mle <sup>6</sup>  | 5.52       | 1.77, 1.49 | 1.29       | 0.92, 0.91 | -            | -            | 2.83      |      |
| Phi <sup>7</sup>  | 5.64       | 3.17, 3.11 | -          | 7.26       | 7.30         | 7.27         | -         |      |
| Mle <sup>8</sup>  | 5.37       | 1.68, 1.60 | 0.98       | 0.83, 0.83 | -            | -            | 3.04      |      |
| Lac <sup>15</sup> | 5.44       | 1.39       | -          | -          | -            | -            | -         |      |
| Mle <sup>26</sup> | 5.23       | 1.72, 1.58 | 1.44       | 0.92, 0.90 | -            | -            | 2.73      |      |
| Phi <sup>37</sup> | 5.70       | 3.16, 3.11 | -          | 7.25-7.35* | 7.25-7.35*   | 7.25-7.35*   | -         |      |
| Mle <sup>48</sup> | 5.63       | 1.68, 1.50 | 1.05       | 0.90, 0.85 | -            | -            | 2.74      |      |
|                   | C          | C $\alpha$ | C $\beta$  | C $\gamma$ | C $\delta$   | C $\epsilon$ | C $\zeta$ | CMe  |
| Lac <sup>1</sup>  | 171.6      | 68.6       | 15.8       | -          | -            | -            | -         | -    |
| Mle <sup>2</sup>  | 171.2      | 57.1       | 38.0       | 24.7       | 21.2, 23.4   | -            | -         | 29.4 |
| Phi <sup>3</sup>  | 170.0      | 71.2       | 37.6       | 135.1      | 129.5        | 128.6        | 127.2     | -    |
| Mle <sup>4</sup>  | 169.8      | 54.0       | 37.0       | 24.7       | 21.0, 23.4   | -            | -         | 30.5 |
| Lac <sup>5</sup>  | 170.4      | 66.9       | 17.1       | -          | -            | -            | -         | -    |
| Mle <sup>6</sup>  | 169.8      | 54.0       | 37.5       | 25.1       | 23.6, 20.9   | -            | -         | 30.6 |
| Phi <sup>7</sup>  | 170.2      | 70.8       | 38.0       | 135.4      | 129.5        | 128.5        | 127.1     | -    |
| Mle <sup>8</sup>  | 171.0      | 54.1       | 36.2       | 24.3       | 23.4, 21.1   | -            | -         | 31.2 |
| Lac <sup>15</sup> | 169.9      | 67.5       | 16.4       | -          | -            | -            | -         | -    |
| Mle <sup>26</sup> | 170.6      | 55.1       | 36.7       | 24.9       | 23.1, 21.7   | -            | -         | 31.1 |
| Phi <sup>37</sup> | 169.4      | 70.8       | 37.8       | 135.4      | 129.7        | 128.5        | 127.0     | -    |
| Mle <sup>48</sup> | 170.9      | 54.1       | 37.1       | 24.6       | 21.6, 23.2   | -            | -         | 30.5 |

**Table S 2.** Assignment of the major (asymmetric) and minor (symmetric) conformation of PF1022A in CD<sub>3</sub>OH referenced to the residual CH<sub>3</sub>OH shift in the solvent set to 3.33 ppm. \* indicates non-assignable signals due to overlap and n.d. indicates signals that could not be detected.

|                   | H $\alpha$ | H $\beta$  | H $\gamma$ | H $\delta$ | H $\epsilon$ | H $\zeta$    | HMe       |      |
|-------------------|------------|------------|------------|------------|--------------|--------------|-----------|------|
| Lac <sup>1</sup>  | 5.19       | 0.94       | -          | -          | -            | -            | -         |      |
| Mle <sup>2</sup>  | 4.78       | 1.85, 1.74 | 1.58       | 1.06, 0.99 | -            | -            | 2.82      |      |
| Phi <sup>3</sup>  | 5.83       | 3.19, 3.08 | -          | 7.24-7.35  | 7.24-7.35*   | 7.24-7.35*   | -         |      |
| Mle <sup>4</sup>  | 5.40       | 1.69, 1.64 | 0.86       | 0.84       | -            | -            | 2.90      |      |
| Lac <sup>5</sup>  | 5.55       | 1.40       | -          | -          | -            | -            | -         |      |
| Mle <sup>6</sup>  | 5.45       | 1.75, 1.69 | 1.33       | 0.95, 0.90 | -            | -            | 2.92      |      |
| Phi <sup>7</sup>  | 5.75       | 3.17, 3.11 | -          | 7.24-7.35  | 7.24-7.35*   | 7.24-7.35*   | -         |      |
| Mle <sup>8</sup>  | 5.24       | 1.58, 1.51 | 0.94       | 0.83, 0.80 | -            | -            | 3.01      |      |
| Lac <sup>15</sup> | 5.37       | 1.38       | -          | -          | -            | -            | -         |      |
| Mle <sup>26</sup> | 5.15       | 1.61       | 1.39       | 0.91, 0.87 | -            | -            | 2.94      |      |
| Phi <sup>37</sup> | 5.70       | 3.10       | -          | 7.32       | 7.24-7.35*   | 7.24-7.35*   | -         |      |
| Mle <sup>48</sup> | 5.35       | 1.66       | 1.14       | 0.89, 0.87 | -            | -            | 2.95      |      |
|                   | C          | C $\alpha$ | C $\beta$  | C $\gamma$ | C $\delta$   | C $\epsilon$ | C $\zeta$ | CMe  |
| Lac <sup>1</sup>  | 173.1      | 68.5       | 15.8       | -          | -            | -            | -         | -    |
| Mle <sup>2</sup>  | 171.0      | 57.2       | 37.6       | 24.7       | 20.2, 22.3   | -            | -         | 28.6 |
| Phi <sup>3</sup>  | 171.7      | 71.1       | 37.2       | 134.8      | 129.4        | 128.4        | 126.9     | -    |
| Mle <sup>4</sup>  | 169.3      | 54.3       | 36.4       | 24.1       | 22.3, 20.0   | -            | -         | 29.9 |
| Lac <sup>5</sup>  | 172.1      | 67.1       | 16.1       | -          | -            | -            | -         | -    |
| Mle <sup>6</sup>  | 169.6      | 54.1       | 37.2       | 24.8       | 22.5, 19.7   | -            | -         | 29.7 |
| Phi <sup>7</sup>  | 171.7      | 70.9       | 37.5       | 135.1      | 129.3        | 128.3        | 127.0     | -    |
| Mle <sup>8</sup>  | 170.7      | 54.0       | 35.9       | 23.8       | 22.2, 20.3   | -            | -         | 30.6 |
| Lac <sup>15</sup> | 171.9      | 68.3       | 15.4       | -          | -            | -            | -         | -    |
| Mle <sup>26</sup> | n.d.       | 55.3       | 36.8       | 24.6       | 22.3, 20.1   | -            | -         | 31.0 |
| Phi <sup>37</sup> | 170.7      | 71.3       | 37.1       | 135.5      | 129.3        | 128.3        | 126.8     | -    |
| Mle <sup>48</sup> | 170.2      | 54.3       | 36.9       | 24.3       | 22.2, 20.3   | -            | -         | 30.3 |

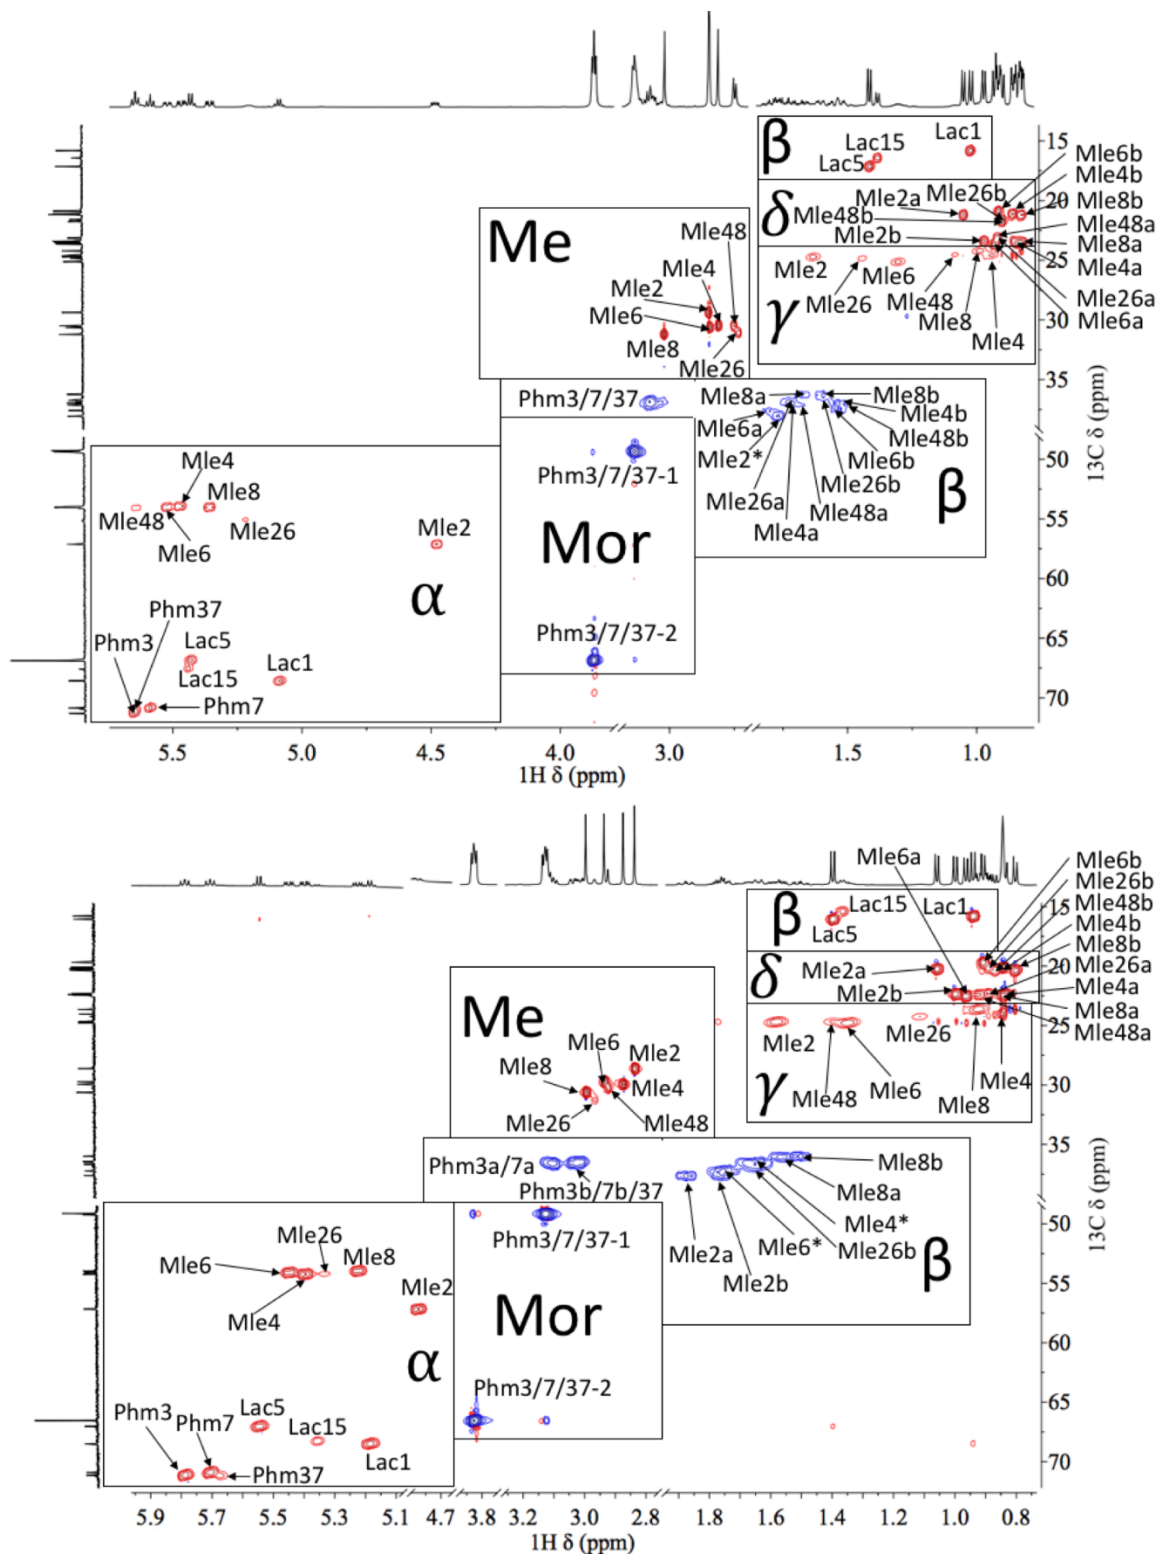

**Figure S 2.**  $^{13}\text{C}$ -HSQC spectra of emodepside (**2**) in  $\text{CDCl}_3$  (top) and in  $\text{CD}_3\text{OH}$  (bottom). Empty regions are cut out for clarity.

**Table S 3.** Assignment of the major (asymmetric) and minor (symmetric) conformation of emodepside (**2**) in CDCl<sub>3</sub> referenced to the residual CHCl<sub>3</sub> shift in the solvent set to 7.28 ppm. \* indicates non-assignable signals due to overlap. Mor1 is the C/H next to the oxygen in the morpholine ring, and Mor2 is the C/H next to the nitrogen in the morpholine ring.

|                   | H $\alpha$ | H $\beta$  | H $\gamma$ | H $\delta$ | H $\epsilon$ |              | HMe          | HMor1      | HMor2      |       |
|-------------------|------------|------------|------------|------------|--------------|--------------|--------------|------------|------------|-------|
| Lac <sup>1</sup>  | 5.09       | 1.03       | -          | -          | -            |              | -            | -          | -          |       |
| Mle <sup>2</sup>  | 4.49       | 1.77       | 1.64       | 1.05, 0.98 | -            |              | 2.85         | -          | -          |       |
| Phm <sup>3</sup>  | 5.65       | 3.08       | -          | 7.13-7.17* | 6.84         |              | -            | 3.12-3.16* | 3.87       |       |
| Mle <sup>4</sup>  | 5.47       | 1.73, 1.54 | 0.94       | 0.85       | -            |              | 2.82         | -          | -          |       |
| Lac <sup>5</sup>  | 5.43       | 1.42       | -          | -          | -            |              | -            | -          | -          |       |
| Mle <sup>6</sup>  | 5.53       | 1.81, 1.54 | 1.31       | 0.92       | -            |              | 2.85         | -          | -          |       |
| Phm <sup>7</sup>  | 5.59       | 3.07       | -          | 7.13-7.17* | 6.85         |              | -            | 3.12-3.16* | 3.87       |       |
| Mle <sup>8</sup>  | 5.36       | 1.68, 1.60 | 1.0        | 0.83       | -            |              | 3.02         | -          | -          |       |
| Lac <sup>15</sup> | 5.44       | 1.39       | -          | -          | -            |              | -            | -          | -          |       |
| Mle <sup>26</sup> | 5.21       | 1.73, 1.60 | 1.45       | 0.92, 0.90 | -            |              | 2.76         | -          | -          |       |
| Phm <sup>37</sup> | 5.64       | 3.04       | -          | 7.13-7.17* | 6.83         |              | -            | 3.11       | 3.87       |       |
| Mle <sup>48</sup> | 5.63       | 1.69, 1.51 | 1.09       | 0.90, 0.86 | -            |              | 2.74         | -          | -          |       |
|                   | C          | C $\alpha$ | C $\beta$  | C $\gamma$ | C $\delta$   | C $\epsilon$ | C $\zeta$    | CMe        | CMor1      | CMor2 |
| Lac <sup>1</sup>  | 171.7      | 68.6       | 15.8       | -          | -            | -            | -            | -          | -          | -     |
| Mle <sup>2</sup>  | 171.2      | 57.1       | 38.1       | 24.7       | 21.2, 23.4   | -            | -            | 29.4       | -          | -     |
| Phm <sup>3</sup>  | 170.1      | 71.3       | 36.8       | 126.1      | 130.3        | 115.6        | 150.3-150.4* | -          | 49.3-49.4* | 66.9  |
| Mle <sup>4</sup>  | 169.8      | 54.0       | 37.0       | 24.6       | 21.1, 23.6   | -            | -            | 30.5       | -          | -     |
| Lac <sup>5</sup>  | 170.3      | 66.9       | 17.1       | -          | -            | -            | -            | -          | -          | -     |
| Mle <sup>6</sup>  | 169.8      | 54.0       | 37.6       | 25.1       | 20.9, 23.7   | -            | -            | 30.6       | -          | -     |
| Phm <sup>7</sup>  | 170.4      | 70.9       | 37.1       | 126.6      | 130.3        | 115.6        | 150.3-150.4* | -          | 49.3-49.4* | 66.9  |
| Mle <sup>8</sup>  | 171.1      | 54.0       | 36.2       | 24.2       | 21.2, 23.5   | -            | -            | 31.2       | -          | -     |
| Lac <sup>15</sup> | 169.9      | 67.6       | 16.4       | -          | -            | -            | -            | -          | -          | -     |
| Mle <sup>26</sup> | 170.6      | 55.2       | 36.7       | 24.8       | 23.1, 21.6   | -            | -            | 31.2       | -          | -     |
| Phm <sup>37</sup> | 169.6      | 70.9       | 36.9       | 126.7      | 130.4        | 115.6        | 150.3        | -          | 49.4       | 66.9  |
| Mle <sup>48</sup> | 171.0      | 54.1       | 37.1       | 24.6       | 21.8, 23.4   | -            | -            | 30.5       | -          | -     |

**Table S 4.** Assignment of the major (asymmetric) and minor (symmetric) conformation of emodepside (**2**) in CD<sub>3</sub>OH referenced to the residual CH<sub>3</sub>OH shift in the solvent set to 3.33 ppm. \* indicates non-assignable signals due to overlap and n.d. indicates signals that could not be detected. Mor1 is the C/H next to the oxygen in the morpholine ring, and Mor2 is the C/H next to the nitrogen in the morpholine ring.

|                   | H $\alpha$ | H $\beta$  | H $\gamma$ | H $\delta$ | H $\epsilon$ |              | HMe          | HMor1      | HMor2      |       |
|-------------------|------------|------------|------------|------------|--------------|--------------|--------------|------------|------------|-------|
| Lac <sup>1</sup>  | 5.18       | 0.94       | -          | -          | -            |              | -            | -          | -          |       |
| Mle <sup>2</sup>  | 4.78       | 1.88, 1.76 | 1.58       | 1.06, 1.00 | -            |              | 2.84         | -          | -          |       |
| Phm <sup>3</sup>  | 5.79       | 3.11, 3.02 | -          | 7.19       | 6.92         |              | -            | 3.12-3.14* | 3.83       |       |
| Mle <sup>4</sup>  | 5.40       | 1.65       | 0.85       | 0.84       | -            |              | 2.87         | -          | -          |       |
| Lac <sup>5</sup>  | 5.55       | 1.40       | -          | -          | -            |              | -            | -          | -          |       |
| Mle <sup>6</sup>  | 5.45       | 1.75       | 1.35       | 0.96, 0.91 | -            |              | 2.94         | -          | -          |       |
| Phm <sup>7</sup>  | 5.71       | 3.11, 3.03 | -          | 7.19       | 6.92         |              | -            | 3.12-3.14* | 3.83       |       |
| Mle <sup>8</sup>  | 5.23       | 1.57, 1.50 | 0.92       | 0.83, 0.80 | -            |              | 3.00         | -          | -          |       |
| Lac <sup>15</sup> | 5.36       | 1.37       | -          | -          | -            |              | -            | -          | -          |       |
| Mle <sup>26</sup> | 5.33       | 1.65       | 1.11       | 0.89, 0.87 | -            |              | 2.97         | -          | -          |       |
| Phm <sup>37</sup> | 5.68       | 3.01       | -          | 7.18       | 6.92         |              | -            | 3.12       | 3.83       |       |
| Mle <sup>48</sup> | 5.11       | 1.65       | 1.40       | 0.92, 0.89 | -            |              | 2.92         | -          | -          |       |
|                   | C          | C $\alpha$ | C $\beta$  | C $\gamma$ | C $\delta$   | C $\epsilon$ | C $\zeta$    | CMe        | CMor1      | CMor2 |
| Lac <sup>1</sup>  | 173.1      | 68.5       | 15.8       | -          | -            | -            | -            | -          | -          | -     |
| Mle <sup>2</sup>  | 170.9      | 57.2       | 37.6       | 24.7       | 20.2, 22.3   | -            | -            | 28.6       | -          | -     |
| Phm <sup>3</sup>  | 171.8      | 71.2       | 36.5       | 125.5      | 130.0        | 115.5        | 150.6-150.7* | -          | 49.1-49.2* | 66.6  |
| Mle <sup>4</sup>  | 169.4      | 54.2       | 36.5       | 24.0       | 22.5, 20.1   | -            | -            | 30.0       | -          | -     |
| Lac <sup>5</sup>  | 172.1      | 67.1       | 16.1       | -          | -            | -            | -            | -          | -          | -     |
| Mle <sup>6</sup>  | 169.6      | 54.1       | 37.2       | 24.8       | 22.5, 19.7   | -            | -            | 29.7       | -          | -     |
| Phm <sup>7</sup>  | 171.8      | 70.9       | 36.7       | 125.8      | 130.0        | 115.5        | 150.6-150.7* | -          | 49.1-49.2* | 66.6  |
| Mle <sup>8</sup>  | 170.7      | 54.0       | 36.0       | 23.6       | 22.4, 20.3   | -            | -            | 30.6       | -          | -     |
| Lac <sup>15</sup> | 171.9      | 68.3       | 15.4       | -          | -            | -            | -            | -          | -          | -     |
| Mle <sup>26</sup> | n.d.       | 54.2       | 36.8       | 24.3       | 22.3, 20.4   | -            | -            | 31.3       | -          | -     |
| Phm <sup>37</sup> | 170.8      | 71.3       | 36.4       | 126.4      | 130.0        | 115.6        | 150.5        | -          | 49.3       | 66.6  |
| Mle <sup>48</sup> | 170.4      | n.d.       | n.d.       | 24.7       | 22.4, 20.1   | -            | -            | 30.3       | -          | -     |

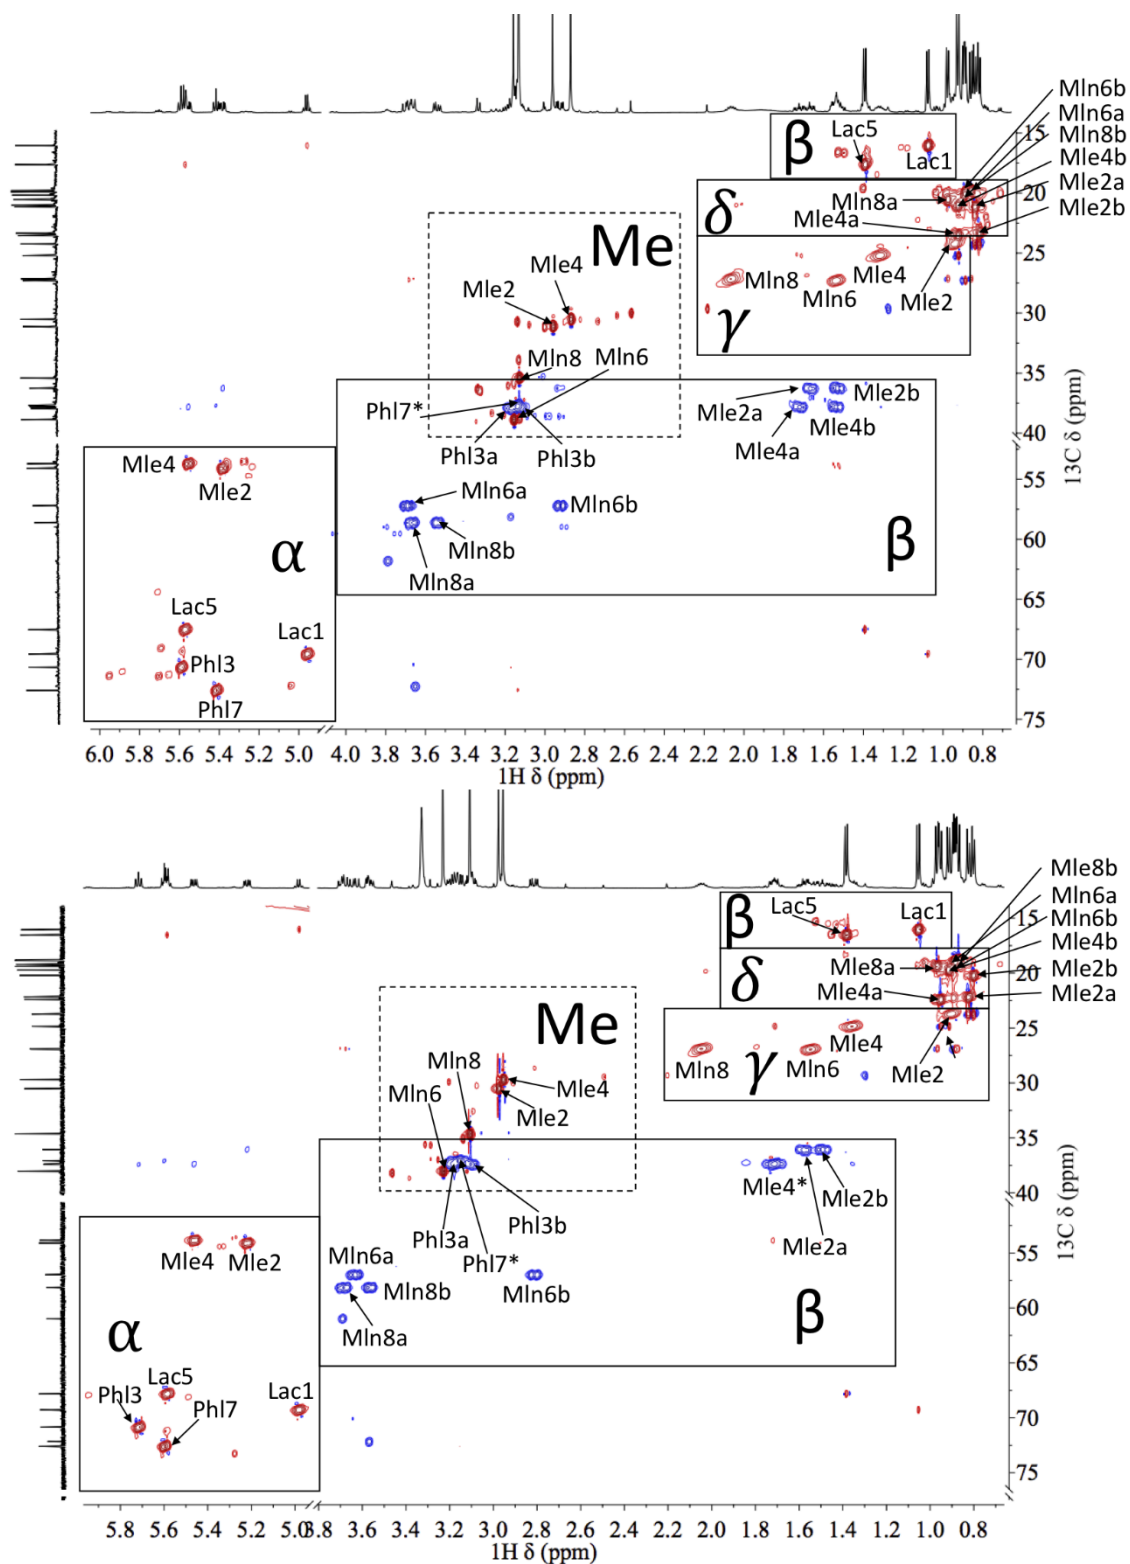

**Figure S 3.**  $^{13}\text{C}$ -HSQC spectra of bis-aza-PF1022A analog (**8**) in  $\text{CDCl}_3$  (top) and in  $\text{CD}_3\text{OH}$  (bottom). Empty regions are cut out for clarity.



**Table S 5.** Assignment of the major conformation (asymmetric) as well as assignment of H $\alpha$  chemical shifts for the minor conformation (symmetric) denoted with ' of the bis-aza PF1022A analog (**8**) in CDCl<sub>3</sub> referenced to the residual CHCl<sub>3</sub> shift in the solvent set to 7.28 ppm.

|                   | H $\alpha$ | H $\beta$  | H $\gamma$ | H $\delta$ | H $\epsilon$ | H $\zeta$    | HMe       |      |
|-------------------|------------|------------|------------|------------|--------------|--------------|-----------|------|
| Lac <sup>1</sup>  | 4.96       | 1.08       | -          | -          | -            | -            | -         |      |
| MIn <sup>2</sup>  | -          | 3.67, 3.35 | 2.07       | 0.98, 0.86 | -            | -            | 3.13      |      |
| Phi <sup>3</sup>  | 5.42       | 3.14       | -          | 7.25       | 7.34         | 7.26         | -         |      |
| MIn <sup>4</sup>  | -          | 3.69, 2.93 | 1.54       | 0.89, 0.89 | -            | -            | 3.16      |      |
| Lac <sup>5</sup>  | 5.57       | 1.39       | -          | -          | -            | -            | -         |      |
| Mle <sup>6</sup>  | 5.56       | 1.72, 1.54 | 1.32       | 0.92       | -            | -            | 2.87      |      |
| Phi <sup>7</sup>  | 5.59       | 3.18, 3.13 | -          | 7.26       | 7.31         | 7.29         | -         |      |
| Mle <sup>8</sup>  | 5.38       | 1.67, 1.54 | 0.94       | 0.83, 0.82 | -            | -            | 2.96      |      |
| Phi <sup>3'</sup> | 5.81       |            |            |            |              |              |           |      |
| Lac <sup>5'</sup> | 5.28       |            |            |            |              |              |           |      |
| Mle <sup>6'</sup> | 3.68       |            |            |            |              |              |           |      |
| Phi <sup>7'</sup> | 5.99       |            |            |            |              |              |           |      |
| Mle <sup>8'</sup> | 5.01       |            |            |            |              |              |           |      |
|                   | C          | C $\alpha$ | C $\beta$  | C $\gamma$ | C $\delta$   | C $\epsilon$ | C $\zeta$ | CMe  |
| Lac <sup>1</sup>  | 173.4      | 69.6       | 16.0       | -          | -            | -            | -         | -    |
| MIn <sup>2</sup>  | 154.7      | -          | 58.6       | 27.2       | 20.5, 19.8   | -            | -         | 35.4 |
| Phi <sup>3</sup>  | 168.7      | 72.6       | 37.7       | 134.9      | 129.4        | 128.7        | 127.1     | -    |
| MIn <sup>4</sup>  | 154.0      | -          | 57.2       | 27.3       | 20.2, 19.8   | -            | -         | 38.9 |
| Lac <sup>5</sup>  | 171.0      | 67.6       | 17.7       | -          | -            | -            | -         | -    |
| Mle <sup>6</sup>  | 170.2      | 53.7       | 37.8       | 25.2       | 23.6, 21.0   | -            | -         | 30.5 |
| Phi <sup>7</sup>  | 170.2      | 70.7       | 38.0       | 135.4      | 129.5        | 128.5        | 127.4     | -    |
| Mle <sup>8</sup>  | 171.5      | 54.1       | 36.3       | 24.3       | 21.2, 23.3   | -            | -         | 31.1 |

**Table S 6.** Assignment of the major conformation of the bis-aza PF1022A analog (**8**) in CD<sub>3</sub>OH referenced to the residual CH<sub>3</sub>OH shift in the solvent set to 3.33 ppm.

|                  | H $\alpha$ | H $\beta$  | H $\gamma$ | H $\delta$ | H $\epsilon$ | H $\zeta$    | HMe       |      |
|------------------|------------|------------|------------|------------|--------------|--------------|-----------|------|
| Lac <sup>1</sup> | 4.98       | 1.06       | -          | -          | -            | -            | -         |      |
| MIn <sup>2</sup> | -          | 3.69, 3.57 | 2.05       | 0.97, 0.87 | -            | -            | 3.11      |      |
| Phi <sup>3</sup> | 5.60       | 3.16       | -          | 7.34       | 7.34         | 7.29         | -         |      |
| MIn <sup>4</sup> | -          | 3.64, 2.98 | 1.55       | 0.89, 0.88 | -            | -            | 3.23      |      |
| Lac <sup>5</sup> | 5.59       | 1.38       | -          | -          | -            | -            | -         |      |
| Mle <sup>6</sup> | 5.46       | 1.72       | 1.36       | 0.95, 0.92 | -            | -            | 2.96      |      |
| Phi <sup>7</sup> | 5.72       | 3.19, 3.10 | -          | 7.32       | 7.32         | 7.28         | -         |      |
| Mle <sup>8</sup> | 5.22       | 1.58, 1.49 | 0.90       | 0.82, 0.81 | -            | -            | 2.98      |      |
|                  | C          | C $\alpha$ | C $\beta$  | C $\gamma$ | C $\delta$   | C $\epsilon$ | C $\zeta$ | CMe  |
| Lac <sup>1</sup> | 174.2      | 69.3       | 16.1       | -          | -            | -            | -         | -    |
| MIn <sup>2</sup> | 154.7      | -          | 58.2       | 26.9       | 19.4, 18.8   | -            | -         | 34.7 |
| Phi <sup>3</sup> | 169.7      | 72.6       | 37.1       | 134.8      | 129.3        | 128.4        | 127.1     | -    |
| MIn <sup>4</sup> | 153.9      | -          | 57.0       | 27.0       | 18.9, 19.2   | -            | -         | 38.1 |
| Lac <sup>5</sup> | 172.3      | 67.9       | 16.6       | -          | -            | -            | -         | -    |
| Mle <sup>6</sup> | 169.9      | 53.9       | 37.4       | 24.9       | 22.4, 19.8   | -            | -         | 29.7 |
| Phi <sup>7</sup> | 171.9      | 70.9       | 37.5       | 135.1      | 129.4        | 128.3        | 127.0     | -    |
| Mle <sup>8</sup> | 171.2      | 54.1       | 36.1       | 23.8       | 22.2, 20.3   | -            | -         | 30.5 |



## Identification of Additional Conformers Based on Exchange, Exemplified for Compound 1

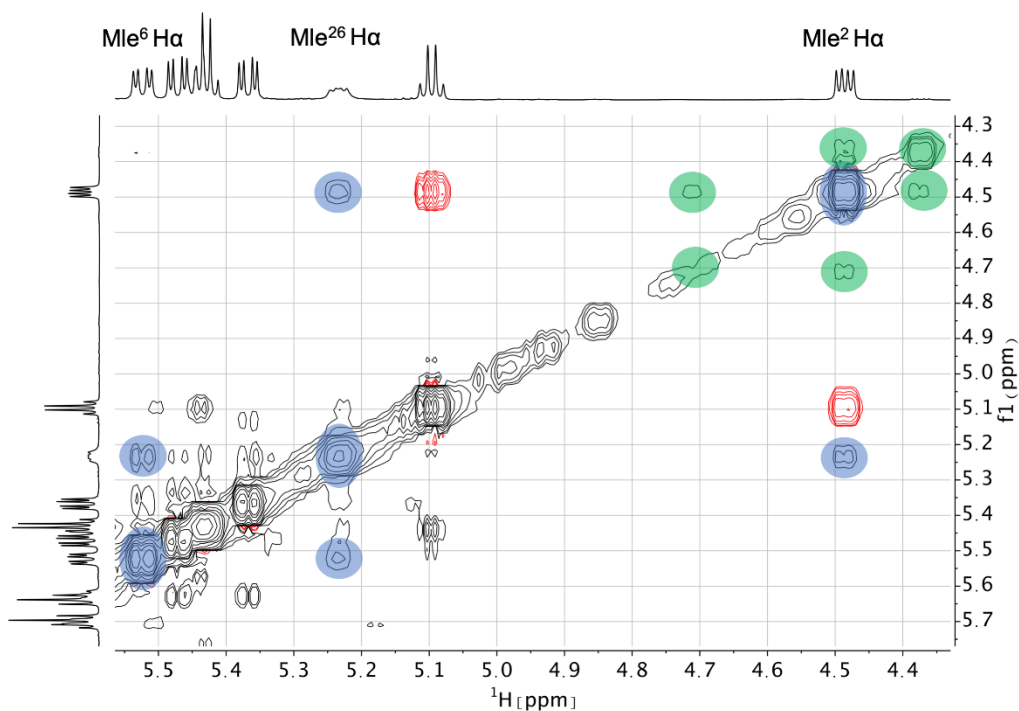

**Figure S 4.** Detail of ROESY spectrum showing the exchange between  $\text{Mle}^2 \text{H}\alpha$  and  $\text{Mle}^{26} \text{H}\alpha$  as well as  $\text{Mle}^6 \text{H}\alpha$  and  $\text{Mle}^{26} \text{H}\alpha$  of PF1022A (**1**) in chloroform (blue). ROE-peaks (red) have opposite phase relative to the diagonal whereas EXSY peaks have the same phase (black). Based on additional exchange peaks to  $\text{Mle}^2 \text{H}\alpha$ , at least two additional conformers with very low intensity could be identified.

## Plots for Fitting $T_2$ Relaxation Times of PF1022A (1) in Chloroform

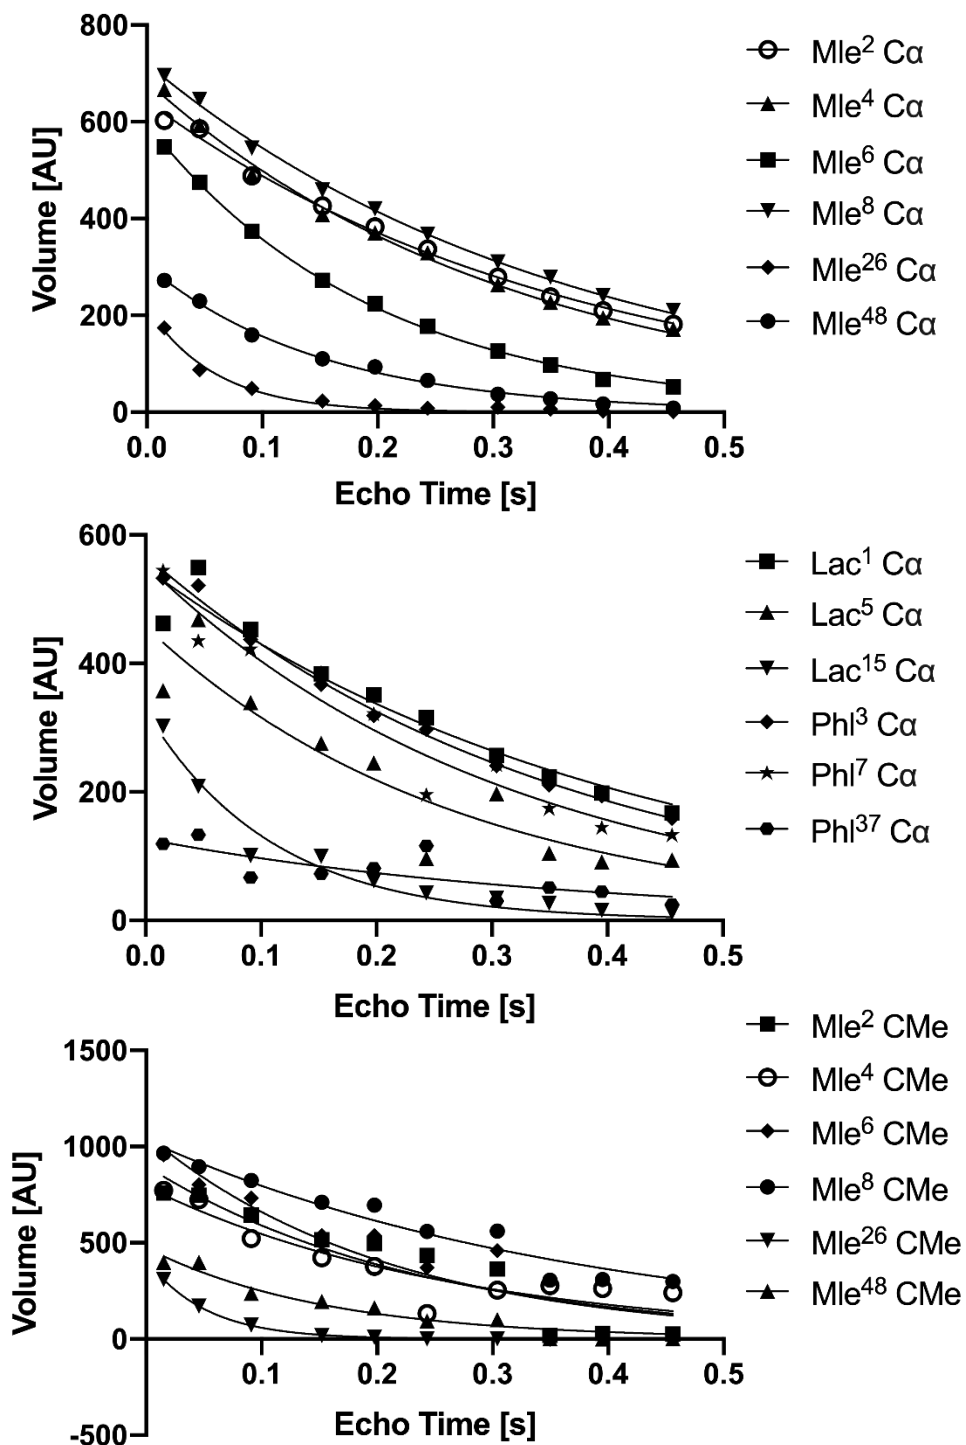

**Figure S 5.** Volumes extracted from the CPMG  $^{13}\text{C}$  HSQC spectra plotted against the echo time to obtain the corresponding  $T_2$  relaxation times for PF1022A (1) in chloroform. The plots were created with Prism.

**Extracted Volumes and  $M_0$  Values Used for Calculation of Site-to-Site Exchange Rates for compounds 1 (A), 2 (B), 8 (C) and 11 (D) in chloroform:**

$$A = \begin{pmatrix} \frac{77.9}{1} & \frac{1.52}{1.5} & \frac{1.55}{1.5} \\ \frac{1.59}{1} & \frac{236}{1.5} & \frac{0}{1.5} \\ \frac{1.75}{1} & \frac{0}{1.5} & \frac{200}{1.5} \end{pmatrix} \quad B = \begin{pmatrix} \frac{65.8}{1} & \frac{0.93}{1.8} & \frac{1.18}{1.8} \\ \frac{1.00}{1} & \frac{232}{1.8} & \frac{0}{1.8} \\ \frac{1.32}{1} & \frac{0}{1.8} & \frac{216}{1.8} \end{pmatrix}$$

$$C = \begin{pmatrix} \frac{12.9}{1} & \frac{0.50}{9.8} \\ \frac{0.46}{1} & \frac{387}{9.8} \end{pmatrix} \quad D = \begin{pmatrix} \frac{95}{1} & \frac{1.58}{1.5} & \frac{1.7}{1.5} \\ \frac{2.41}{1} & \frac{235}{1.5} & \frac{0}{1.5} \\ \frac{1.82}{1} & \frac{0}{1.5} & \frac{218}{1.5} \end{pmatrix}$$

## MSM Building

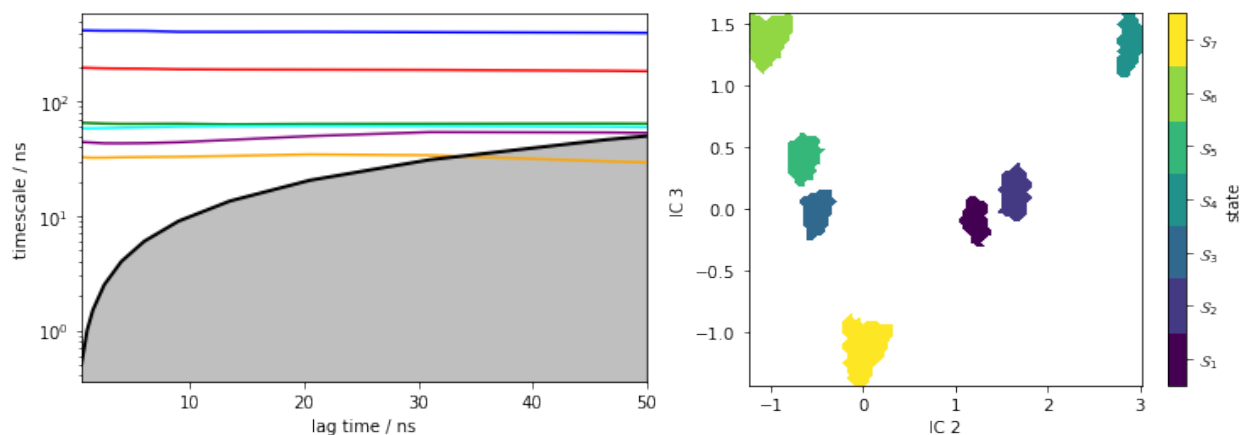

**Figure S 6.** (Left): Implied timescales for the MSM of the symmetric subset of PF1022A (**1**) in chloroform. Six slow transitions were observed. (Right): The seven conformational states of the symmetric subset plotted with the second and third TICA element. The first TICA element describes mainly the dihedral undergoing *cis-trans* isomerization and is thus not relevant for the symmetric subset.

**Table S 8.** Stationary distribution and corresponding free energies of the seven conformational states in the MSM of the symmetric subset of PF1022A (**1**) in chloroform.

| State | Stationary distribution [%] | Estimated free energy [kT] |
|-------|-----------------------------|----------------------------|
| 1     | 3.1                         | 3.5                        |
| 2     | 6.5                         | 2.7                        |
| 3     | 7.4                         | 2.6                        |
| 4     | 11.3                        | 2.2                        |
| 5     | 11.9                        | 2.1                        |
| 6     | 16.5                        | 1.8                        |
| 7     | 43.2                        | 0.8                        |

## Titration of Emodepside with KSCN. General Procedure for the Fitting of Titration Data.

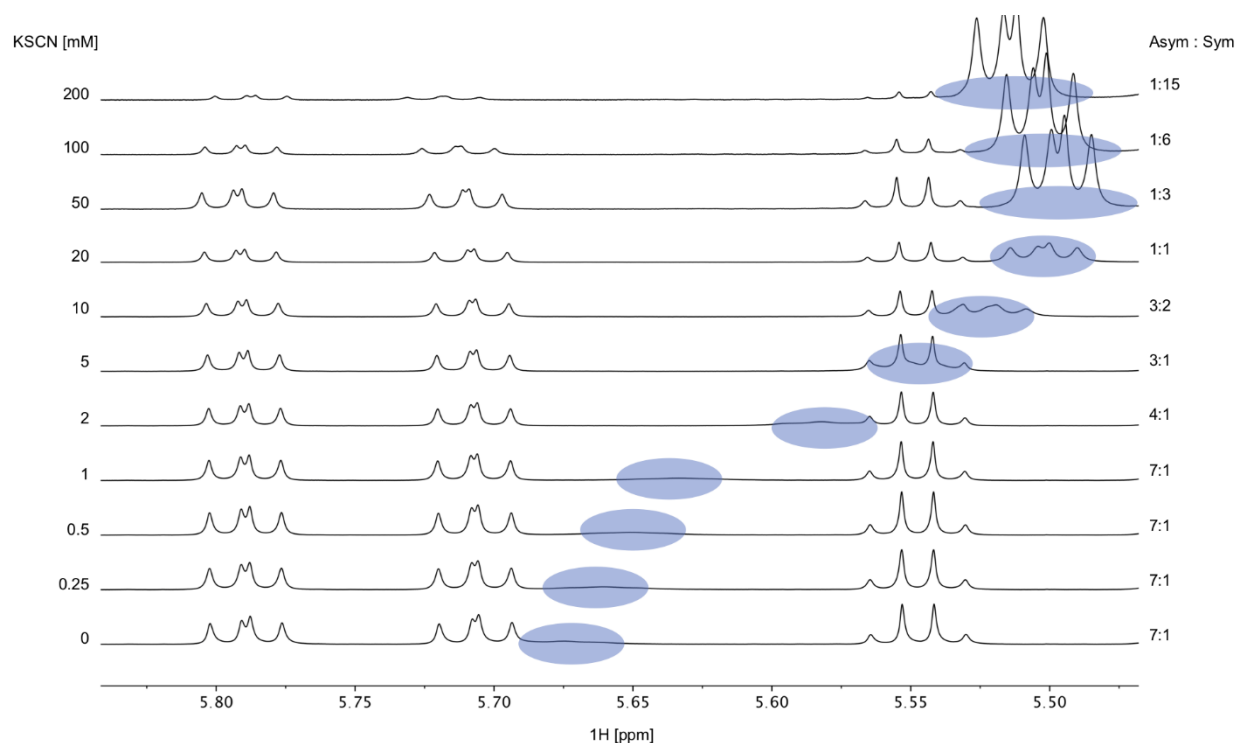

**Figure S 7.** H $\alpha$  region of  $^1\text{H}$  NMR spectra of 5 mM emodepside (**2**) in  $\text{CD}_3\text{OH}$  at different KSCN concentrations. Chemical shift changes were observed for the symmetric conformation, best seen for the signal of the H $\alpha$  proton in residue Phm<sup>37</sup> (blue labels). In addition, a change in the ratio between the symmetric and asymmetric conformation is observed. Also the asymmetric conformation shows small chemical shift changes at high salt concentrations.

The concentration of the symmetric conformation in dependence of the salt concentration was fitted with the following equation (damped logistic growth function):

$$[P_{free}] = [P_{all}] - ([P_{all}] - [P_0]) * e^{\frac{-a*[S]}{[S]+b}}$$

where  $[P_{free}]$  is the concentration of the free symmetric peptide,  $[P_{all}]$  the total peptide concentration,  $[P_0]$  the symmetric peptide concentration without salt,  $[S]$  the salt concentration, and  $a$  and  $b$  are the fitting parameters.



The chemical shift change in dependence of the salt concentration was fitted using the following equations assuming a fast equilibrium between the free symmetric species, the 1:1 complex and a 2:1 complex:

$$\delta_{obs} = \delta_P - \frac{(\delta - \delta_{PS}) * [S_{tot}] * K_1 * [P_{free}] + 2 * (\delta_P - \delta_{P_2S}) * [S_{tot}] * K_1 * K_2 * [P_{free}]^2}{P_0 * (1 + K_1 * [P_{free}] + K_1 * K_2 * [P_{free}]^2)}$$

$$0 = K_1 * K_2 * [P_{free}]^3 + K_1 * (2 * K_2 * [S_{tot}] - K_2 * [P_{tot}] + 1) * [P_{free}]^2 + (K_1 * ([S_{tot}] - [P_{tot}]) + 1) * [P_{free}] - [P_{tot}]$$

$$\text{with } K_1 = \frac{[PS]}{[P_{free}][S]} \text{ and } K_2 = \frac{[P_2S]}{[PS][S]}$$

where  $\delta_{obs}$  corresponds to the observed chemical shift,  $\delta_P$  is the chemical shift of the symmetric free peptide,  $\delta_{PS}$  is the chemical shift of the 1:1 symmetric peptide-cation complex ( $PS$ ),  $\delta_{P_2S}$  the shift of the 2:1 symmetric peptide-cation complex ( $P_2S$ ),  $[P_{tot}]$  the total concentration of the peptide (all symmetric species), directly determined from the integral of the signal of the symmetric species in  $^1H$  NMR spectrum,  $[S_{tot}]$  is the total salt concentration,  $[P_{free}]$  the free symmetric peptide concentration, and  $K_1$  and  $K_2$  are the equilibrium constants for the 1:1 and the 2:1 complexes. Fitting was done with R.

## Experimental Results for mono-iodine analog (11):

**Table S 9.** Ratio between asymmetric and symmetric conformer in CD<sub>3</sub>OH and CDCl<sub>3</sub> for compounds **11**.

| Compound                       | Conformer ratio in CD <sub>3</sub> OH<br>(asymmetric : symmetric) | Conformer ratio in CDCl <sub>3</sub><br>(asymmetric : symmetric) |
|--------------------------------|-------------------------------------------------------------------|------------------------------------------------------------------|
| Mono-iodo analog ( <b>11</b> ) | 5:1                                                               | 3:1                                                              |

**Table S 10.** Exchange rates between asymmetric and symmetric conformers of **11** in CDCl<sub>3</sub> determined from EASY-ROESY experiment with mixing time of 100 ms.

| Compound                       | k <sub>1</sub> [s <sup>-1</sup> ] | k <sub>2</sub> [s <sup>-1</sup> ] | k <sub>ex</sub> [s <sup>-1</sup> ] |
|--------------------------------|-----------------------------------|-----------------------------------|------------------------------------|
| Mono-iodo analog ( <b>11</b> ) | 0.17                              | 0.09                              | 0.26                               |

**Table S 11.** Change in ratio between asymmetric and symmetric conformer without salt and after addition of a 25-fold excess of CsSCN in CD<sub>3</sub>OH.

| Salt  | Mono-iodo analog ( <b>11</b> ) |
|-------|--------------------------------|
| CsSCN | 5:1 to 1:80                    |

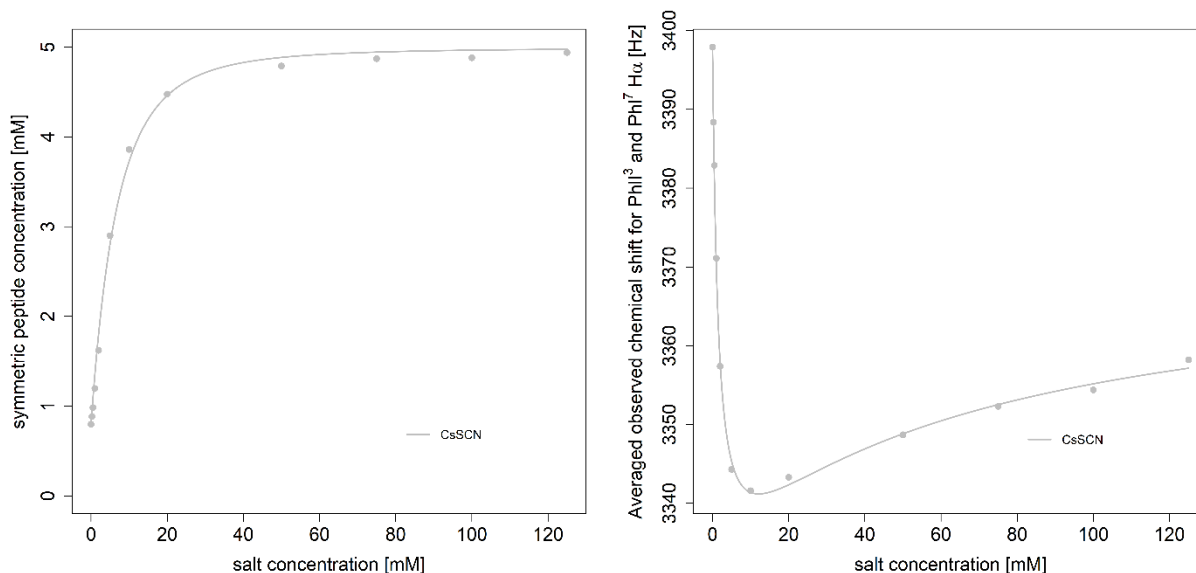

**Figure S 8.** Titration of 5 mM mono-iodine analog (**11**) with CsSCN in CD<sub>3</sub>OH while the total volume was kept constant. (Left): Change in concentration of the symmetric conformation upon the addition of CsSCN. The data points were fitted with a damped logistic growth function. (Right): Change of the chemical shift of the averaged signal of PhiI<sup>3</sup> and PhiI<sup>7</sup> H $\alpha$  proton of the symmetric conformation as a function of the salt concentration.

## Permeability Data PAMPA for compounds 1, 2 and 8

**Table S 12.** PAMPA results of compounds 1, 2 and 8 with and without the addition of 100 mM KCl. Carbamazepine was used as control for the PAMPA and showed permeabilities between 7.94 and 11.1 \*  $10^{-6}$  cm s<sup>-1</sup> and recovery rates between 85.4 and 199.9 %.

| Compound                        | Average Permeability with standard deviation in brackets [ $10^{-6}$ cm s <sup>-1</sup> ] | Average Recovery Rate [%] |
|---------------------------------|-------------------------------------------------------------------------------------------|---------------------------|
| PF1022A (1)                     | 0.06 [0.03]                                                                               | 18.4                      |
| Emodepside (2)                  | 0.00 [0.00]                                                                               | 78.7                      |
| Bis-aza analog (8)              | 0.08 [0.03]                                                                               | 26.2                      |
| PF1022A (1) + 100 mM KCl        | 0.02 [0.01]                                                                               | 57.4                      |
| Emodepside (2) + 100 mM KCl     | 0.00 [0.00]                                                                               | 27.3                      |
| Bis-aza analog (8) + 100 mM KCl | 0.00 [0.00]                                                                               | 6.8                       |
